# Supplementary material for: Next-generation mapping: a novel approach for detection of pathogenic structural variants with a potential utility in clinical diagnosis
Source: PubMed Central journal article supplement (PMC5655859; doi:10.1186/s13073-017-0479-0), 2017-10-25
Supplement: 13073_2017_479_MOESM1_ESM.pdf [file 13073_2017_479_MOESM1_ESM.pdf]

| Exon | Forward Primer            | Reverse Primer            | Annealing Temperature |
|------|---------------------------|---------------------------|-----------------------|
| 2    | tgcatTTtagATGAAAGAGAAGATG | aaaacggattTTtaagatacacagg | 60                    |
| 3    | tggaagtgtgctTTgttaaattg   | tgccaaatgaaaatcatacagag   | 60                    |
| 4    | gtaccaggccaaggacaattag    | aagccctcactcaaacatgaag    | 60                    |
| 5    | cccTTtctttaacagGTTGATT    | catttgtTtcacacgtcaagg     | 60                    |
