# Supplementary material for: Next-generation mapping: a novel approach for detection of pathogenic structural variants with a potential utility in clinical diagnosis
Source: PubMed Central journal article supplement (PMC5655859; doi:10.1186/s13073-017-0479-0), 2017-10-25

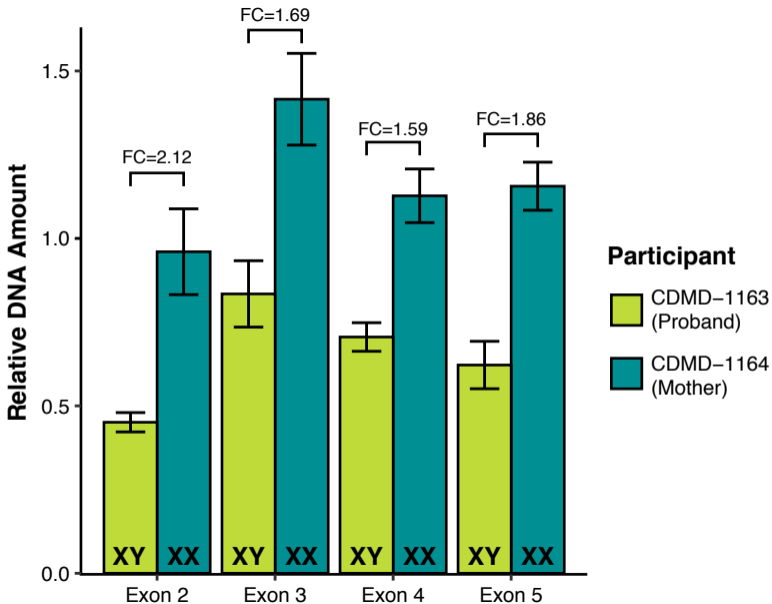

Supplement: 13073_2017_479_MOESM2_ESM.pdf [file 13073_2017_479_MOESM2_ESM.pdf]
